## Retraction: The prognostic potential and carcinogenesis of long non-coding RNA TUG1 in human cholangiocarcinoma

Yi Xu<sup>1,2</sup>, Kaiming Leng<sup>1</sup>, Zhenglong Li<sup>1,2</sup>, Fumin Zhang<sup>1,2</sup>, Xiangyu Zhong<sup>1</sup>, Pengcheng Kang<sup>1</sup>, Xingming Jiang<sup>1</sup> and Yunfu Cui<sup>1</sup>

<sup>1</sup>Department of Hepatopancreatobiliary Surgery, Second Affiliated Hospital of Harbin Medical University, Harbin, China

<sup>2</sup>Department of The Key Laboratory of Myocardial Ischemia, Harbin Medical University, Ministry of Education, Harbin, China

**Published:** August 30, 2023

**Copyright:** © 2023 Xu et al. This is an open access article distributed under the terms of the [Creative Commons Attribution License](#) (CC BY 3.0), which permits unrestricted use, distribution, and reproduction in any medium, provided the original author and source are credited.

**This article has been retracted:** Several images in this paper are duplicates of images in other published papers. In Figure 5C, a panel is duplicated within Figure 6D of another paper [1]. In Figure 5B, a panel is duplicated within Figure 2F of another paper [2]. In Figure 6A, a panel is duplicated within Figure 8A of this same paper [2]. Although this article was published earlier than the other articles, the Oncotarget Scientific Integrity Office decided to retract this article given concerns about the accuracy and authenticity of the data. All authors have agreed to this retraction.

### REFERENCES

1. Chen M, Liu X, Xie P, Wang P, Liu M, Zhan Y, Wang H, Feng Y, Li Y. Circular RNA circ\_0074026 indicates unfavorable prognosis for patients with glioma and facilitates oncogenesis of tumor cells by targeting miR-1304 to modulate ERBB4 expression. *J Cell Physiol.* 2020; 235:4688–97. <https://doi.org/10.1002/jcp.29347>. [PubMed]
2. Gao P, Wang Z, Hu Z, Jiao X, Yao Y. Circular RNA circ\_0074027 indicates a poor prognosis for NSCLC patients and modulates cell proliferation, apoptosis, and invasion via miR-185-3p mediated BRD4/MADD activation. *J Cell Biochem.* 2020; 121:2632–42. <https://doi.org/10.1002/jcb.29484>. [PubMed]

Original article: *Oncotarget.* 2017; 8:65823–65835. <https://doi.org/10.18632/oncotarget.19502>
